# Supplementary material for: Impacts of climate change and deforestation on hydropower planning in the Brazilian Amazon
Source: Springer Nature journal article supplement (doi:10.1038/s41893-020-0492-y), 2020-03-16
Supplement: 41893_2020_492_MOESM1_ESM.pdf [file 41893_2020_492_MOESM1_ESM.pdf]

In the format provided by the authors and unedited.

# Impacts of climate change and deforestation on hydropower planning in the Brazilian Amazon

Mauricio E. Arias <sup>1,2</sup> , Fabio Farinosi <sup>1,3,4</sup>, Eunjee Lee <sup>1,5</sup>, Angela Livino <sup>1,6</sup>, John Briscoe<sup>1,8</sup> and Paul R. Moorcroft<sup>1,7</sup>

---

<sup>1</sup>Sustainability Science Program, Kennedy School of Government, Harvard University, Cambridge, MA, USA. <sup>2</sup>Department of Civil and Environmental Engineering, University of South Florida, Tampa, FL, USA. <sup>3</sup>Ca' Foscari University of Venice, Venice, Italy. <sup>4</sup>Joint Research Center, European Commission, Ispra, Italy. <sup>5</sup>Goddard Earth Sciences Technology and Research and Global Modeling and Assimilation Office, NASA Goddard Space Flight Center, Greenbelt, MD, USA. <sup>6</sup>Energy Research Office, Rio de Janeiro, Brazil. <sup>7</sup>Department of Organismic and Evolutionary Biology, Harvard University, Cambridge, MA, USA. <sup>8</sup>Deceased: John Briscoe. ✉e-mail: [mearias@usf.edu](mailto:mearias@usf.edu)

**Title:** Impacts of climate change and deforestation on hydropower planning in the Brazilian Amazon

**Supplementary Figures**

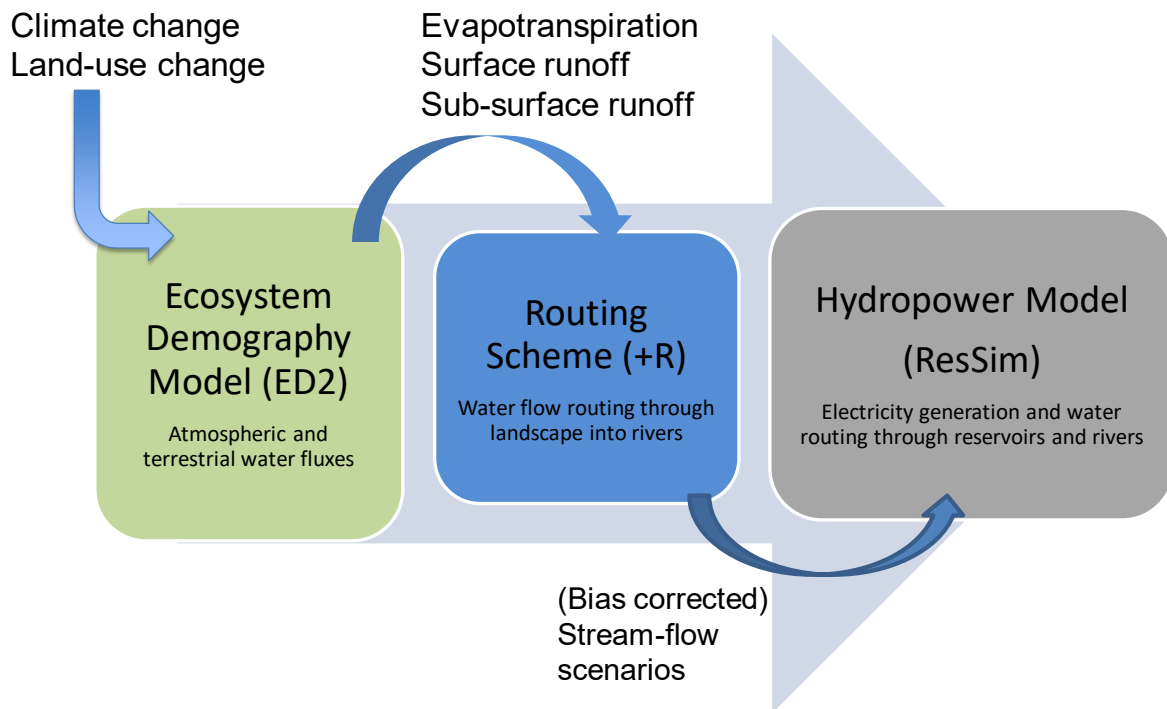

**Supplementary Fig 1.** Modeling framework used in this study

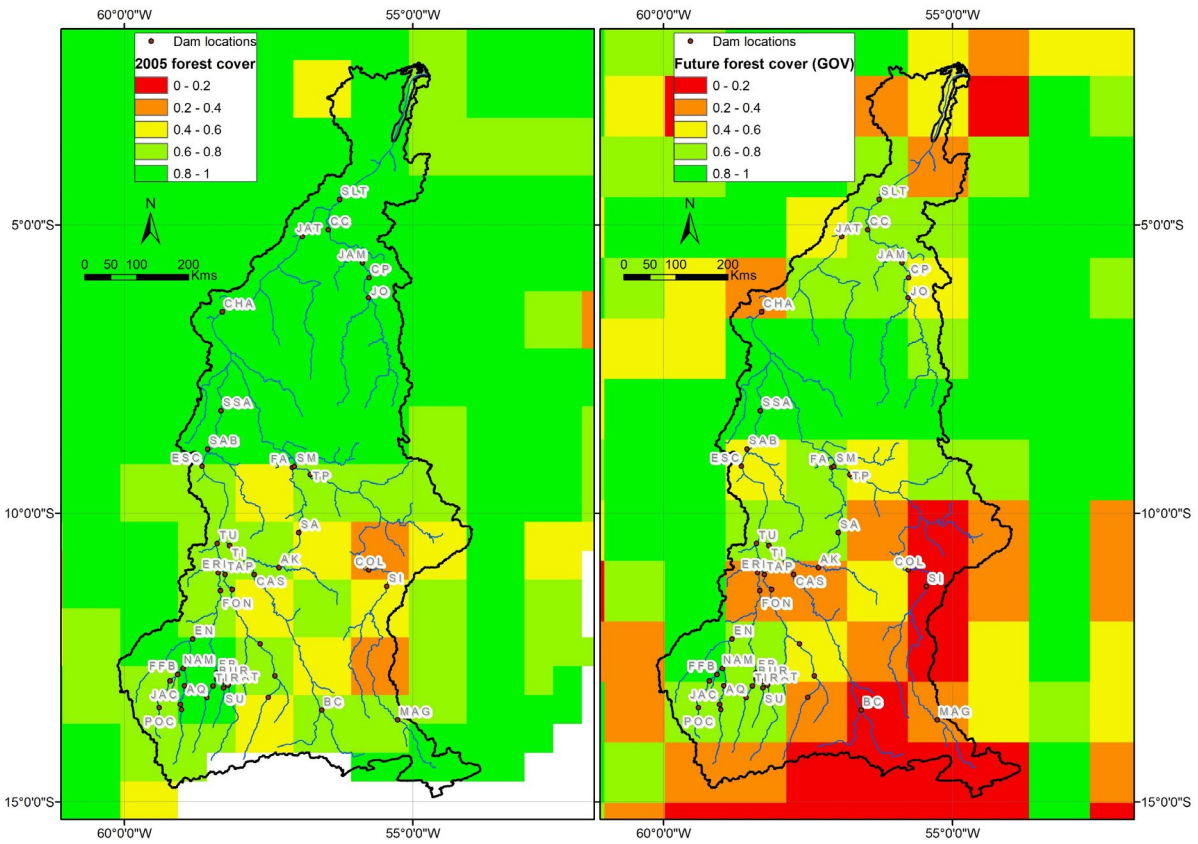

**Supplementary Fig 2.** Comparison of forest cover percentage in the baseline scenarios (left) and in the future deforestation scenarios (right). Deforestation projection results from Soares-Filho *et al.*<sup>1</sup>.

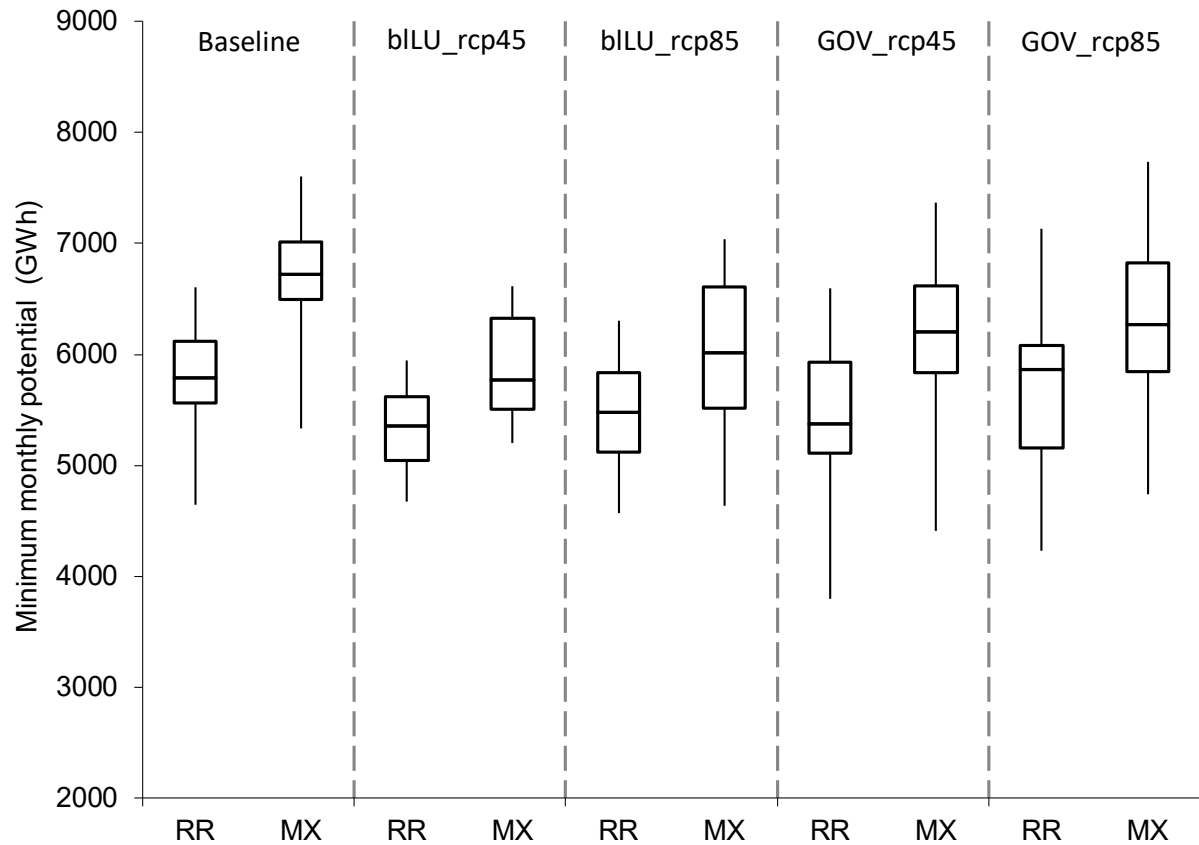

**Supplementary Fig 3.** Comparison of power generation during the critical period (minimum month per year) for different future scenarios and for different reservoir operation rules. Run-of-the-river (RR) operations aim to maintain maximum water levels every month, while the optimized operation (MX) scenario modifies monthly water level at individual dams to maximize annual power generation for the entire system. Operation optimization is sufficient to significantly increase minimum monthly production for each scenario when compared to its RR counterpart. When compared to baseline conditions, future scenarios with optimized operations (MX) are not significantly different from the baseline RR, thus sufficient to offset future potential declines. Pairwise comparisons carried out with a t-test are presented in Supplementary Table 3.

## Supplementary Tables

Supplementary Table 1. Database of hydropower project feasibility and design in the Tapajos Basin. Compiled from available information from Brazil's National Electricity Agency's library in November of 2014.

| Name code | ANEEL code | Name                 | River           | 2016 Status                  | Operation | Lat            | Lon            | Drainage area (ha) | Area_reservoir (ha) | Vol reser (hm) | Dam height (m) | Dam Elevation (m) | Dam length (m) | Potential Installed (MW) | Plant efficiency (%) | Outlet minimum elevation (m) | Min operation flow | Outlet - total max discharge (m <sup>3</sup> /s) | # of outlets/turbines | Turbine type |
|-----------|------------|----------------------|-----------------|------------------------------|-----------|----------------|----------------|--------------------|---------------------|----------------|----------------|-------------------|----------------|--------------------------|----------------------|------------------------------|--------------------|--------------------------------------------------|-----------------------|--------------|
| SLT       | 266        | Sao Luiz do Tapajos  | rio Tapajos     | Suspended                    | R-o/R     | -4.5639264999  | -56.2727403342 | 452783             | 722.3               | 7,553.83       | 35.8           | 54.0              | 7,608          | 8040.0                   | 92                   | 12.8, 24.0                   | 5530, 296.7        | 18435.4, 898.4                                   | 31, 2                 | Kaplan       |
| CAS       | ARN-120    | Castanheira          | rio Arinos      | Feasibility study registered | R-o/R     | -11.0628486384 | -57.7503493704 | 40452              | 119.0               |                | 22.0           | 236.5             | 1335.0         | 192.0                    | 98                   | 214.5                        | 456.0              | 1520.0                                           |                       | 3 Bulbo      |
| COL       | TPR-680    | Colider              | rio Teles Pires | Construction                 | Variation | -10.9837301038 | -55.7637309124 | 41508              | 123.3               | 1582.0         | 23.8           | 272.5             | 1223.0         | 300.0                    | 90                   | 248.3                        | 419.4              | 1398.0                                           |                       | 3 Kaplan     |
| JAT       | TPJ-456    | Jatoba               | rio Tapajos     | Feasibility study registered | R-o/R     | -5.2037497924  | -56.9149084367 | 386711             | 646.3               | 4,014.15       | 16.0           | 70.0              | 1287           | 2338.0                   | 92                   | 50.0                         | 5082.8             | 16942.6                                          |                       | 40 Bulbo     |
| SA        | 3          | Salto Apiacas        | rio Apiacas     | Basic plan approved          | R-o/R     | -10.3383355260 | -56.9812503207 | 7237               | 47.0                | 3864.537       | 26.5           | 252.0             | 450.0          | 45.0                     | 88                   | 221.0                        | 70.2               | 234.14                                           |                       | 3 Kaplan     |
| SM        | TPR-287    | Sao Manoel           | rio Teles Pires | Construction                 | R-o/R     | -9.1888854663  | -57.0511144849 | 91488              | 53.0                | 577            | 24.9           | 165.0             | 559.0          | 700.0                    | 92.8                 | 139.4                        | 1141.5             | 3805.0                                           |                       | 5 Kaplan     |
| SI        | TPR-775    | Sinop                | rio Teles Pires | Construction                 |           | -11.2698260609 | -55.4526738714 | 37983              | 329.6               | 3071.0         | 31.5           | 304.0             | 1000.0         | 400.0                    | 93                   | 268.9                        | 536.7              | 1789.0                                           |                       | 3 Kaplan     |
| TP        | TPR-329    | Teles Pires          | rio Teles Pires | Construction                 |           | -9.3331941019  | -56.7762503289 | 90704              | 123.4               | 904.5          | 59.0           | 224.0             | 956.0          | 1820.0                   | 92                   | 165.0                        | 1716.8             | 3815.0                                           |                       | 6 Francis    |
| AQ        | BUR-077    | Agua Quente          | rio Buriiti     | Suspended                    | Variation | -13.1955658323 | -58.5695835905 | 2980               | 33.0                |                | 49.0           | 419               | >645           | 51.0                     | 98                   | 387.5                        | 56.7               | 126.1                                            |                       | 2 Francis    |
| AK        | PEX-093    | Apiaka-Kayabi        | rio dos Peixes  | Inventory                    | Variation | -10.9415464063 | -57.3232138163 | 11172              | 33.0                | 13.0           | 65.5           | 284               | 820.0          | 206.0                    | 98                   | 214.5                        | 162.3              | 360.6                                            |                       | 2 Francis    |
| BC        |            | Barra do Claro       | rio Arinos      | Inventory                    | R-o/R     | -13.4112494636 | -56.5812503367 | 9022               | 69.3                | 433.1          | 18.0           | 290.0             | 1300.0         | 61.0                     | 90                   | 272.0                        | 121.2              | 404.0                                            |                       | 3 Kaplan     |
| BUR       | BUR-013    | Buriiti              | rio Buriiti     | Suspended                    | R-o/R     | -12.8745223630 | -58.3987502640 | 3635               | 15.0                |                | 57.0           | 332               | 538.0          | 86.0                     | 98                   | 313.9                        | 81.4               | 180.9                                            |                       | 2 Francis    |
| CC        | JMX-044    | Cachoeira do Cai     | rio Jamaxim     | Feasibility study registered | Variation | -5.0850434493  | -56.4670836746 | 56661              | 420.0               | 3418.1         | 34.5           | 89.0              | 893            | 802.0                    | 92                   | 51.00                        | 800.1              | 2,666.90                                         | 5                     | Kaplan       |
| CP        | JMX-212    | Cachoeira dos Patos  | rio Jamaxim     | Feasibility study registered | Variation | -5.9170830973  | -55.7599554806 | 38758              | 116.5               | 696.8          | 33.0           | 180.0             | 2,370          | 528.0                    | 92                   | 143.50                       | 549.3              | 1,831.10                                         | 3                     | Kaplan       |
| CHA       | TPJ-699    | Chacorao             | rio Tapajos     | Inventory                    | R-o/R     | -6.5097017064  | -58.3055355671 | 346861             | 616.2               | 4.0            | 40.0           | 100.0             | 1667.4         | 3336.0                   | 92                   | 70.4                         | 4286.4             | 14288.0                                          |                       | 21 Kaplan    |
| EN        | JRN-720    | Enawenê-Nawê         | rio Juruena     | Inventory                    | R-o/R     | -12.1811254213 | -58.8177928217 | 28567              | 80.0                |                | 17.5           | 275.0             | 1200           | 214.0                    | 98                   | 253.5                        | 450.3              | 1500.9                                           |                       | 4 Bulbo      |
| ERI       | JRN-530    | Erikpatsa            | rio Juruena     | Inventory                    | R-o/R     | -11.0293207310 | -58.3748457608 | 58142              | 90.0                | 726.0          | 32.5           | 244.5             | 1552.0         | 583.0                    | 98                   | 217.0                        | 827                | 2757                                             |                       | 4 Kaplan     |
| ESC       | JRN-277    | Escondido            | rio Juruena     | Inventory                    | R-o/R     | -9.1848550624  | -58.6537502538 | 161257             | 1029.0              | 7.5            | 20.5           | 204.0             | 2945.0         | 1248.0                   | 98                   | 174.5                        | 1996               | 6654                                             |                       | 10 Kaplan    |
| FON       | JRN-577    | Fontanilhas          | rio Juruena     | Inventory                    | Variation | -11.3399545079 | -58.3370835998 | 57521              | 563.0               |                | 13.0           | 257.5             | 360.0          | 284.0                    | 98                   | 240.5                        | 798.9              | 2663.1                                           |                       | 5 Bulbo      |
| FA        | API-006    | Foz do Apiacas       | rio Apiacas     | Feasibility study in process | R-o/R     | -9.2062496322  | -57.0881193855 | 16024              | 59.5                | 5945.0         | 56.4           | 189.0             | 361.0          | 275.0                    | 88                   | 140.0                        | 326.5              | 725.6                                            |                       | 2 Francis    |
| FB        | PPG-115    | Foz do Buriiti       | rio Papagaio    | Inventory                    | R-o/R     | -12.7609447017 | -58.3979169307 | 15865              | 22.0                |                | 15.0           | 272.5             | 1185.0         | 104.0                    | 98                   | 250.3                        | 203.6              | 678.8                                            |                       | 2 Kaplan     |
| FFB       | JUL-029b   | Foz do Formiga Baixo | rio Juína       | Feasibility study registered | R-o/R     | -12.7941747308 | -59.0766754778 | 7868               | 26.0                | 225.0          | 49.5           | 351.5             | 1245.0         | 150.0                    | 98                   | 302.0                        | 169.5              | 376.6                                            |                       | 2 Francis    |
| FS        | PPG-147    | Foz do Sacre         | rio Papagaio    | Inventory                    | R-o/R     | -12.9196336863 | -58.2946344709 | 11510              | 21.0                | 275.0          | 36.0           | 308.5             | 715.0          | 163.8                    | 98                   | 269.8                        | 151.4              | 504.82                                           |                       | 2 Kaplan     |
| JAC       | JUL-048    | Jacare               | rio Juína       | Inventory                    | Variation | -12.9045828178 | -59.2074834005 | 5637               | 109.0               | 609.0          | 40.5           | 386.5             | 1110.0         | 63.4                     | 98                   | 347.0                        | 63.9               | 213.1                                            |                       | 2 Kaplan     |
| JAM       | JMX-171    | Jamaxim              | rio Jamaxim     | Feasibility study registered | Variation | -5.6579164409  | -55.8743442759 | 39888              | 74.5                | 1004.8         | 57.5           | 147.0             | 1,205          | 881.0                    | 92                   | 85.30                        | 778.14             | 1,729.20                                         | 3                     | Francis      |
| JO        | JMX-259    | Jardim do Ouro       | rio Jamaxim     | Inventory                    | Variation | -6.2639864648  | -55.7668469883 | 37456              | 426.1               | 1977.6         | 14.0           | 194.0             | 1,117          | 227.0                    | 92                   | 172.00                       | 516.8              | 1,722.70                                         | 4                     | Bulbo        |
| MAG       | TPR-1230   | Magessi              | rio Teles Pires | Feasibility study registered | R-o/R     | -13.5808425921 | -55.2641572556 | 10864              | 60.0                |                | 13.5           | 362.0             | 733.0          | 53.0                     | 87                   | 341.0                        | 111.8              | 372.8                                            |                       | 2 Kaplan     |
| MAT       | SAC-014    | Matrinxã             | rio Sacre       | Inventory                    | R-o/R     | -12.9812494808 | -58.2037502718 | 6987               | 0.9                 |                | 17.4           | 328.4             | 290.0          | 49.0                     | 98                   | 307.0                        | 91.9               | 306.4                                            |                       | 2 Kaplan     |
| NAM       | JUL-008    | Nambikwara           | rio Juína       | Feasibility study registered | R-o/R     | -12.6879161593 | -58.9813103502 | 8229               | 5.0                 | 18.0           | 38.0           | 353.5             | 1195.0         | 102.7                    | 98                   | 271.0                        | 110.7              | 368.9                                            |                       | 2 Kaplan     |
| POC       | JUL-117    | Pocilga              | rio Juína       | Inventory                    | Variation | -13.3714031099 | -59.3969299136 | 3278               | 1.0                 | 8.0            | 42.5           | 429.0             | 935.0          | 48.2                     | 98                   | 382.5                        | 41.1               | 137.0                                            |                       | 2 Kaplan     |
| SAB       | JRN-234b   | Salto Augusto Baixo  | rio Juruena     | Feasibility study            | R-o/R     | -8.8870829783  | -58.5564802511 | 172881             | 107.0               | 362.0          | 25.0           | 183.5             | 1555.0         | 1461.0                   | 98                   | 148.6                        | 1902.6             | 6341.9                                           |                       | 9 Kaplan     |
| SU        | PPG-159    | Salto do Utiariti    | rio Papagaio    | Inventory                    | Variation | -13.0280418078 | -58.2810689292 | 4367               | 2.0                 | 3.0            | 73.5           | 382               | 4150.0         | 107.4                    | 98                   | 364.9                        | 78.5               | 174.4                                            |                       | 2 Francis    |
| SSA       | JRN-117a   | São Simão alto       | rio Juruena     | Feasibility study registered | R-o/R     | -8.2250053353  | -58.3254169336 | 175606             | 284.0               | 659.0          | 52.5           | 159               | 1645.0         | 3509.0                   | 98                   | 102.0                        | 3434.4             | 7632.0                                           |                       | 13 Francis   |
| TAP       | SAN-020    | Tapires              | rio do Sangue   | Inventory                    | R-o/R     | -11.0630048107 | -58.2538388558 | 29371              | 45.0                |                | 8.0            | 229               | 964.0          | 75.0                     | 98                   | 198.4                        | 342.9              | 1143.1                                           |                       | 2 Bulbo      |
| TIR       | BUR-039    | Tireatinga           | rio Buriiti     | Suspended                    | Variation | -12.9958120778 | -58.4633128574 | 3405               | 32.0                |                | 38.0           | 370               | 872.0          | 46.0                     | 98                   | 331.5                        | 60.2               | 133.8                                            |                       | 2 Francis    |
| TI        | ARN-026    | Travesso dos Indios  | rio Arinos      | Inventory                    | Variation | -10.5595829116 | -58.1782872174 | 57908              | 243.0               | 1.1            | 18.5           | 219.0             | 735.0          | 252.0                    | 98                   | 200.0                        | 633.4              | 2111.2                                           |                       | 4 Bulbo      |
| TU        | JRN-466    | Tucumã               | rio Juruena     | Feasibility study registered | R-o/R     | -10.5238848542 | -58.3922188719 | 93703              | 220.0               | 1.1            | 17.0           | 221.0             | 800.0          | 633.0                    | 98                   | 200.0                        | 1374               | 4580                                             |                       | 9 Bulbo      |

(Kaplan/Bulbo = .30Qmax ; Francis = .45Qmax)



Supplementary Table 1.Continuation.

| Name code | Storage pts (m3)                                                                                                                        | Area pts (ha)                                                                                | Elevation                                                                                                                                                           | discharge                                                                                                                                                |
|-----------|-----------------------------------------------------------------------------------------------------------------------------------------|----------------------------------------------------------------------------------------------|---------------------------------------------------------------------------------------------------------------------------------------------------------------------|----------------------------------------------------------------------------------------------------------------------------------------------------------|
| SLT       | 775010000, 2102090000, 4362710000, 6848560000, 7553830000, 11782260000                                                                  | 185.01, 354.97, 556.82, 688.43, 722.25, 975.45                                               | Main: 7.10, 7.93, 8.70, 10.06, 10.65, 12.99, 15.67, 16.58, 17.40, 18.13; secondary: 23.54, 23.67, 23.93, 24.53, 24.83, 25.41, 25.89, 26.25, 26.47, 26.66, 27, 27.34 | Main: 0, 1000, 2000, 4000, 5000, 10000, 20000, 25000, 30000, 35000; Secondary: 0, 807, 2384, 5537, 7114, 10268, 13272, 15983, 18026, 20275, 25454, 30000 |
| CAS       | 4000000, 81000000, 316000000, 768000000, 1.6176225E9                                                                                    | 500, 3000, 6600, 11700, 20150.00                                                             | 211.22, 211.85, 212.16, 212.64, 213.36, 213.66, 214.89, 216.76, 219.57, 220.74, 225.58, 226.41                                                                      | 0,50,100,200,400,500,1000,2000,4000,5000,10000,11000                                                                                                     |
| COL       | 0, 7850000, 97160000, 314770000, 693290000, 1072300000                                                                                  | 0,81.5, 2984, 5883, 9394, 12332                                                              | 240.86, 242.69, 243.53, 243.81, 244.07, 244.31, 244.76, 245.36, 245.72, 246.55, 247.29, 247.96                                                                      | 0, 250, 500, 600, 700, 800, 1000, 1300, 1500, 2000, 2500, 3000                                                                                           |
| JAT       | 242420000, 1198840000, 3392280000, 4014150000, 7267430000                                                                               | 102.45, 296.97, 597.77, 646.3, 992.68                                                        | 47.41, 48, 48.67, 49.41, 5, 50.14, 50.83, 51.54, 52.27, 52.64, 53.36, 54.43                                                                                         | 0,00, 2,617, 5893, 9,168,00, 10,806, 12373, 15483, 18879, 22551, 24488, 28560, 35151                                                                     |
| SA        | 0, 209353, 682131, 2080000, 3864537                                                                                                     | 0, 16, 47, 75, 94.4                                                                          | 221                                                                                                                                                                 |                                                                                                                                                          |
| SM        | 0, 4530000, 33100000, 104260000, 226650000, 423260000, 474710000                                                                        | 0, 272, 938, 1972, 2957, 4996, 5295                                                          | 128.76, 132.26, 133.1, 133.82, 135.05, 136.09, 137.87, 139.38, 140.73, 141.95, 143.09, 144.15                                                                       | 0,500,750,1000,1500,2000,3000,4000,5000,6000,7000,8000                                                                                                   |
| SI        | 0, 0, 27830000, 157330000, 437210000, 926380000, 1648E10+6, 2951E10+6, 3.81881469E9                                                     | 0, 12, 1497, 3887, 7505, 12255, 18348, 32957, 40206.90                                       | 264.58, 266.87, 267.64, 267.88, 268.1, 268.31, 268.67, 269.15, 269.43, 270.05, 270.59, 271.06                                                                       | 0, 250, 500, 600, 700, 800, 1000, 1300, 1500, 2000, 2500, 3000                                                                                           |
| TP        | 0, 970000, 2590000, 4730000, 7970000, 12560000, 19560000, 32040000, 62590000, 131370000, 263820000, 511700000, 975*10E+6, 1.258125223E9 | 0, 28, 37, 49, 82, 102, 185, 316, 965, 1833, 3560, 6502, 12342, 64238.54                     | 140.83, 154.49, 156, 157.18, 158.98, 160.39, 162.27, 163.51, 164.54, 165.42, 166.2, 166.9                                                                           | 0,50,750,1000,1500,2000,3000,4000,5000,6000,7000,8000                                                                                                    |
| AQ        | 0, 3000000, 11000000, 25000000, 50000000, 90000000, 148000000, 229000000, 340000000, 487000000, 672000000                               | 0, 98, 197, 408, 632, 959, 1361, 1959, 2590, 2592, 3359, 4135                                | 363, 365, 366.3, 367.3, 368, 368.7, 369.4                                                                                                                           | 20, 50, 100, 150, 200, 250, 300                                                                                                                          |
| AK        | 362000000, 601000000                                                                                                                    | 6600                                                                                         | 208.8, 210.3, 210.94, 211.85, 213.14, 213.66, 215.72, 218.65, 222.82, 224.5, 231.15, 232.26                                                                         | 0, 50, 100, 200, 400, 500, 1000, 2000, 4000, 5000, 10000, 11000                                                                                          |
| BC        | 45140000, 172810000, 433090000, 871770000, 1535550000                                                                                   | 1597.5, 3648.6, 6927, 10748.9, 15974.3                                                       | 272.03, 271.70, 271.38, 271.04, 270.68                                                                                                                              | 404, 363.6, 323.2, 282.8, 242.4                                                                                                                          |
| BUR       | 2000000, 5000000, 11000000, 19000000, 30000000, 45000000, 66000000, 95000000, 135000000, 188000000, 259000000, 357000000                | 0, 75, 125, 175, 225, 400, 500, 700, 900, 1200, 1700, 2200                                   | 270                                                                                                                                                                 |                                                                                                                                                          |
| CC        | 557390000, 980320000, 1813080000, 3015650000, 3418080000, 6047550000                                                                    | 5704, 11554, 22345, 38512, 42000, 63944                                                      | 45.45, 45.6, 45.74, 46.02, 46.55, 46.81, 47.99, 49.93, 52.75, 53.92, 59.46, 60.26                                                                                   | 0, 50, 100, 200, 400, 500, 1000, 2000, 4000, 5000, 10000, 11000                                                                                          |
| CP        | 37530000, 82610000, 230044000, 588520000, 696840000, 1.111299133E9                                                                      | 395, 1532, 4646, 10035, 11650, 17992.19                                                      | 138.48, 138.67, 138.86, 139.22, 139.9, 140.22, 141.62, 143.77, 146.94, 148.47, 149.97, 151.55                                                                       | 0, 50, 100, 200, 400, 500, 1000, 2000, 4000, 5000, 6000, 7333                                                                                            |
| CHA       | 3.37E+08, 1.03E+09, 1.96E+09, 3.49E+09, 3.49E+09, 4.00E+09                                                                              | 11641, 16143, 21115, 41382, 61623                                                            | 62.97, 66.45, 67.37, 68.36, 69.36, 70.35, 71.31, 72.27, 73.27, 74.22, 75.22, 76.17                                                                                  | 0, 2573.0, 4013.7, 5747.3, 7.768.7, 10071.9, 12652.0, 15505.1, 18627.4, 22015.9, 25667.6, 29580.0                                                        |
| EN        | 1000000, 19000000, 113000000, 371000000, 833000000, 1512000000                                                                          | 100, 700, 3300, 7200, 11400, 15900                                                           | 253                                                                                                                                                                 |                                                                                                                                                          |
| ERI       | 4.00E+06, 4.90E+07, 1.52E+08, 3.50E+08, 6.84E+08                                                                                        | 500, 1300, 2900, 5100, 8300                                                                  | 211.40, 212.58, 213.01, 213.60, 214.40, 214.72, 215.94, 217.61, 219.89, 220.79, 224.24, 224.81                                                                      | 0, 50, 100, 200, 400, 500, 1000, 2000, 4000, 5000, 10000, 11000                                                                                          |
| ESC       | 1.20E+07, 2.06E+08, 1.10E+09, 3.42E+09, 7.51E+09                                                                                        | 1500, 6900, 31800, 62600, 102900                                                             | 176.11, 176.24, 176.33, 176.47, 176.70, 176.80, 177.24, 177.95, 179.12, 179.63, 181.85, 182.25                                                                      | 0, 50, 100, 200, 400, 500, 1000, 2000, 4000, 5000, 10000, 11000                                                                                          |
| FON       | 1000000, 412000000, 2088000000, 4851000000                                                                                              | 100, 23100, 45200, 65900                                                                     | 238.5                                                                                                                                                               |                                                                                                                                                          |
| FA        | 0, 210000, 6770000, 21490000, 45350000, 80960000, 131070000, 202440000, 306020000, 463450000, 7.08E10+6                                 | 0, 64, 212, 385, 575, 858, 1154, 1720, 2445, 3910, 5945                                      | 132.23, 135.37, 136.44, 137.89, 138.95, 139.83, 140.58, 141.26, 142.43, 143.45, 144.77, 146.63                                                                      | 0, 50, 100, 200, 300, 400, 500, 600, 800, 1000, 1300, 1800                                                                                               |
| FB        | 0, 8000000, 29000000, 75000000, 164000000, 316000000                                                                                    | 0, 100, 300, 600, 1200, 2200                                                                 | 251                                                                                                                                                                 |                                                                                                                                                          |
| FFB       | 396000000, 620000000, 932000000, 1401000000, 2169000000, 3025000000, 4096000000, 5435000000                                             | 0, 1, 10, 50, 100, 300, 900, 1700, 2700, 3700, 5300, 7300, 11600, 15300, 19000, 23900, 29700 | 296.41, 300.08, 301.07, 302.33, 303.93, 304.53, 306.73, 309.52, 313.07, 314.4, 319.27, 320.03                                                                       |                                                                                                                                                          |
| FS        | 0, 4000000, 16000000, 37000000, 72000000, 122000000, 192000000, 286000000                                                               | 0, 100, 300, 600, 800, 1200, 1600, 2200                                                      | 264.23, 266.88, 267.43, 268.09, 268.9, 269.19, 270.22, 271.47, 272.98, 273.53, 275.47, 275.76                                                                       | 0, 50, 100, 200, 400, 500, 1000, 2000, 4000, 5000, 10000, 11000                                                                                          |
| JAC       | 0, 5000000, 31000000, 103000000, 273000000, 579000000, 995000000, 1544000000                                                            | 0, 200, 900, 2000, 5100, 7200, 9500, 12600                                                   | 343.76, 347.88, 348.99, 350.4, 352.2, 352.88, 355.34, 358.47, 362.45, 363.95, 369.41, 370.26                                                                        | 0, 50, 100, 200, 400, 500, 1000, 2000, 4000, 5000, 10000, 11000                                                                                          |
| JAM       | 1.29E+08, 2.23E+08, 3.02E+08, 3.31E+08, 3.62E+08, 5.51E+08, 8.05E+08, 1.00E+09, 1.262801414E9                                           | 1444, 2366, 2893, 3025, 3201, 4356, 5875, 7445, 8862.00                                      | 79.89, 80.13, 80.36, 80.81, 81.64, 82.04, 83.76, 86.38, 90.19, 92.04, 94.76, 96.16                                                                                  | 0, 50, 100, 200, 400, 500, 1000, 2000, 4000, 5000, 6500, 7550                                                                                            |
| JO        | 0, 5880000, 94730000, 564540000, 1977590000, 5252340000                                                                                 | 404, 794, 4071, 16037, 42606, 91456                                                          | 171.47, 171.58, 171.68, 171.88, 172.26, 172.98, 173.31, 174.75, 176.86, 179.9, 181.41, 184.12                                                                       | 0, 25, 50, 100, 200, 400, 500, 1000, 2000, 4000, 5000, 7100                                                                                              |
| MAG       | 0, 380000000, 4.6E8                                                                                                                     | 0, 6000, 7263.35                                                                             | 334.46, 337.34, 338.12, 339.11, 340.36, 341.25, 341.96, 342.56, 343.08, 343.55, 344.78, 345.72                                                                      | 0, 25, 50, 100, 200, 300, 400, 500, 600, 700, 1000, 1300                                                                                                 |
| MAT       | 1000000, 500000, 1800000, 5200000                                                                                                       | 0, 10, 40, 90                                                                                | 306                                                                                                                                                                 |                                                                                                                                                          |
| NAM       | 0, 1000000, 3000000, 6000000, 12000000, 19000000, 31000000, 54000000, 91000000                                                          | 0, 50, 100, 130, 160, 200, 300, 600, 900                                                     | 265.45, 269.06, 270.04, 271.28, 272.86, 273.45, 275.61, 278.36, 281.85, 283.17, 287.96, 288.71                                                                      | 0, 50, 100, 200, 400, 500, 1000, 2000, 4000, 5000, 10000, 11000                                                                                          |
| POC       | 0, 10, 1000000, 3000000, 8000000, 22000000                                                                                              | 0, 1, 10, 100, 101, 500                                                                      | 376.58, 381.54, 382.89, 384.59, 386.76, 387.57, 390.54, 394.32, 399.12, 400.92, 407.5, 408.54                                                                       | 0, 50, 100, 200, 400, 500, 1000, 2000, 4000, 5000, 10000, 11000                                                                                          |
| SAB       | 0.00,                                                                                                                                   | 0.00,                                                                                        | 141.85, 144.03, 144.69, 145.55, 146.68, 147.11, 148.71, 150.79, 153.51, 154.55, 158.42,                                                                             | 0, 50, 100, 200, 400, 500, 1000, 2000, 4000, 5000, 10000, 11000                                                                                          |
| SU        | 500000, 9000000                                                                                                                         | 21.8, 387.9                                                                                  | 301.51, 304.12, 304.46, 304.84, 305.28, 305.43, 305.94, 306.52, 307.18, 307.41, 308.18, 308.29                                                                      | 0, 50, 100, 200, 400, 500, 1000, 2000, 4000, 5000, 10000, 11000                                                                                          |
| SSA       | 2000000, 34000000, 125000000, 270000000, 468000000, 748000000, 1184000000, 1827000000, 2717000000, 3956000000, 5556000000               | 200, 1200, 2400, 3400, 4600, 6600, 11000, 14800, 20900, 28900, 35200                         | 96.20, 96.54, 96.73, 97.01, 97.43, 97.61, 98.35, 99.49, 101.22, 101.95, 104.97, 105.49                                                                              | 0, 50, 100, 200, 400, 500, 1000, 2000, 4000, 5000, 10000, 11000                                                                                          |
| TAP       | 0, 22000000, 158000000                                                                                                                  | 0, 1300, 4400                                                                                | 215.4                                                                                                                                                               |                                                                                                                                                          |
| TIR       | 491000000                                                                                                                               | 0, 100, 200, 400, 800, 1300, 2100, 3000, 4000                                                | 327                                                                                                                                                                 |                                                                                                                                                          |
| TI        | 18000000, 323000000, 1258000000                                                                                                         | 2100, 11300, 27300                                                                           | 198.19                                                                                                                                                              |                                                                                                                                                          |
| TU        | 1.20E+07, 1.92E+08, 7.58E+08, 1.95E+06                                                                                                  | 1400, 6400, 17100, 31200                                                                     | 193, 195.64, 196.15, 196.76, 197.49, 197.76, 198.68, 199.78, 201.1, 201.57, 203.24, 203.49                                                                          | 0, 50, 100, 200, 400, 500, 1000, 2000, 4000, 5000, 10000, 11000                                                                                          |
| Note      |                                                                                                                                         |                                                                                              | Two power houses in SST                                                                                                                                             |                                                                                                                                                          |



Supplementary Table 2. Results of the pair-wise Kolmogorov–Smirnov non-parametric test for mean mean daily generation per month.

| Scenario compared |               | JANUARY   |           |           |            |             | FEBRUARY   |            |           |            |                | MARCH      |            |           |            |             | APRIL     |           |           |            |             |
|-------------------|---------------|-----------|-----------|-----------|------------|-------------|------------|------------|-----------|------------|----------------|------------|------------|-----------|------------|-------------|-----------|-----------|-----------|------------|-------------|
| Scenario 1        | Scenario 2    | mean_sim1 | mean_sim2 | diff      | KS p-value | KS_sig      | mean_sim 1 | mean_sim 2 | diff      | KS p-value | KS_sig         | mean_sim 1 | mean_sim 2 | diff      | KS p-value | KS_sig      | mean_sim1 | mean_sim2 | diff      | KS p-value | KS_sig      |
| biLU_rep45_RR     | BL_RR         | 182724.39 | 336215.42 | -153491   | 0          | KS_test_SIG | 260011.5   | 459578.2   | -199566.7 | 0          | KS_test_SIG    | 404011     | 497609     | -93598.01 | 0          | KS_test_SIG | 483569.09 | 504244.9  | -20675.81 | 0          | KS_test_SIG |
| biLU_rep85_RR     | BL_RR         | 185800.59 | 336215.42 | -150414.8 | 0          | KS_test_SIG | 271480.3   | 459578.2   | -188097.9 | 0          | KS_test_SIG    | 402417.4   | 497609     | -95191.66 | 0          | KS_test_SIG | 485555.92 | 504244.9  | -18688.98 | 0          | KS_test_SIG |
| GOV_rep45_RR      | BL_RR         | 185928.23 | 336215.42 | -150287.2 | 0          | KS_test_SIG | 273163.2   | 459578.2   | -186415   | 0          | KS_test_SIG    | 421717.3   | 497609     | -75891.68 | 0          | KS_test_SIG | 494548.3  | 504244.9  | -9696.6   | 0          | KS_test_SIG |
| GOV_rep85_RR      | BL_RR         | 193924.26 | 336215.42 | -142291.2 | 0          | KS_test_SIG | 293120.2   | 459578.2   | -166458   | 0          | KS_test_SIG    | 423620.6   | 497609     | -73988.44 | 0          | KS_test_SIG | 501132.69 | 504244.9  | -3112.2   | 0.0013     | KS_test_SIG |
| BL_MX             | BL_RR         | 322259.5  | 336215.42 | -13955.92 | 0.0321     | KS_test_SIG | 448663.5   | 459578.2   | -10914.73 | 0          | KS_test_SIG    | 487581.4   | 497609     | -10027.67 | 0          | KS_test_SIG | 497250.87 | 504244.9  | -6994.03  | 0          | KS_test_SIG |
| biLU_rep45_MX     | BL_RR         | 215451.57 | 336215.42 | -120763.9 | 0          | KS_test_SIG | 263506.7   | 459578.2   | -196071.5 | 0          | KS_test_SIG    | 385752.6   | 497609     | -111856.4 | 0          | KS_test_SIG | 471855.62 | 504244.9  | -32389.27 | 0          | KS_test_SIG |
| biLU_rep85_MX     | BL_RR         | 215168.4  | 336215.42 | -121047   | 0          | KS_test_SIG | 273827     | 459578.2   | -185751.2 | 0          | KS_test_SIG    | 386527.7   | 497609     | -111081.4 | 0          | KS_test_SIG | 473993.23 | 504244.9  | -30251.66 | 0          | KS_test_SIG |
| GOV_rep45_MX      | BL_RR         | 222588.98 | 336215.42 | -113626.5 | 0          | KS_test_SIG | 264914.2   | 459578.2   | -194664   | 0          | KS_test_SIG    | 399866.2   | 497609     | -97742.8  | 0          | KS_test_SIG | 482112.61 | 504244.9  | -22132.29 | 0          | KS_test_SIG |
| GOV_rep85_MX      | BL_RR         | 223954.1  | 336215.42 | -112261.3 | 0          | KS_test_SIG | 290045.4   | 459578.2   | -169532.8 | 0          | KS_test_SIG    | 408422.8   | 497609     | -89186.23 | 0          | KS_test_SIG | 491704.87 | 504244.9  | -12540.02 | 0          | KS_test_SIG |
| biLUrep85_RR      | biLU_rep45_RR | 185800.59 | 182724.39 | 3076.2    | 0          | KS_test_SIG | 271480.3   | 260011.5   | 11468.82  | 3.00E-05   | KS_test_SIG    | 402417.4   | 404011     | -1593.65  | 0          | KS_test_SIG | 485555.92 | 483569.09 | 1986.83   | 0.0081     | KS_test_SIG |
| GOV_rep45_RR      | biLU_rep45_RR | 185928.23 | 182724.39 | 3203.84   | 0          | KS_test_SIG | 273163.2   | 260011.5   | 13151.66  | 0          | KS_test_SIG    | 421717.3   | 404011     | 17706.33  | 0          | KS_test_SIG | 494548.3  | 483569.09 | 10979.21  | 0          | KS_test_SIG |
| GOV_rep85_RR      | biLU_rep45_RR | 193924.26 | 182724.39 | 11199.88  | 0          | KS_test_SIG | 293120.2   | 260011.5   | 33108.65  | 0          | KS_test_SIG    | 423620.6   | 404011     | 19609.57  | 0          | KS_test_SIG | 501132.69 | 483569.09 | 17563.61  | 0          | KS_test_SIG |
| BL_MX             | biLU_rep45_RR | 322259.5  | 182724.39 | 139535.1  | 0          | KS_test_SIG | 448663.5   | 260011.5   | 188652    | 0          | KS_test_SIG    | 487581.4   | 404011     | 83750.34  | 0          | KS_test_SIG | 497250.87 | 483569.09 | 13681.78  | 0          | KS_test_SIG |
| biLUrep45_MX      | biLU_rep45_RR | 215451.57 | 182724.39 | 32727.18  | 0          | KS_test_SIG | 263506.7   | 260011.5   | 3495.18   | 0.22452    | KS_test_NONSIG | 385752.6   | 404011     | -18258.42 | 0          | KS_test_SIG | 471855.62 | 483569.09 | -11713.47 | 0          | KS_test_SIG |
| biLUrep85_MX      | biLU_rep45_RR | 215168.4  | 182724.39 | 32444.01  | 0          | KS_test_SIG | 273827     | 260011.5   | 13815.52  | 0          | KS_test_SIG    | 386527.7   | 404011     | -17483.35 | 0          | KS_test_SIG | 473993.23 | 483569.09 | -9575.85  | 0          | KS_test_SIG |
| GOV_rep45_MX      | biLU_rep45_RR | 222588.98 | 182724.39 | 39864.59  | 0          | KS_test_SIG | 264914.2   | 260011.5   | 4902.68   | 0.00034    | KS_test_SIG    | 399866.2   | 404011     | -4144.79  | 0          | KS_test_SIG | 482112.61 | 483569.09 | -1456.48  | 0          | KS_test_SIG |
| GOV_rep85_MX      | biLU_rep45_RR | 223954.1  | 182724.39 | 41229.72  | 0          | KS_test_SIG | 290045.4   | 260011.5   | 30033.89  | 0          | KS_test_SIG    | 408422.8   | 404011     | 4411.78   | 0          | KS_test_SIG | 491704.87 | 483569.09 | 8135.79   | 0          | KS_test_SIG |
| GOV_rep45_RR      | biLU_rep85_RR | 185928.23 | 185800.59 | 127.64    | 0          | KS_test_SIG | 273163.2   | 271480.3   | 1682.84   | 0          | KS_test_SIG    | 421717.3   | 402417.4   | 19299.98  | 0          | KS_test_SIG | 494548.3  | 485555.92 | 8992.38   | 0          | KS_test_SIG |
| GOV_rep85_RR      | biLU_rep85_RR | 193924.26 | 185800.59 | 8123.68   | 0          | KS_test_SIG | 293120.2   | 271480.3   | 21639.83  | 3.00E-05   | KS_test_SIG    | 423620.6   | 402417.4   | 21203.23  | 0          | KS_test_SIG | 501132.69 | 485555.92 | 15576.77  | 0          | KS_test_SIG |
| BL_MX             | biLU_rep85_RR | 322259.5  | 185800.59 | 136458.9  | 0          | KS_test_SIG | 448663.5   | 271480.3   | 177183.1  | 0          | KS_test_SIG    | 487581.4   | 402417.4   | 85163.99  | 0          | KS_test_SIG | 497250.87 | 485555.92 | 11694.95  | 0          | KS_test_SIG |
| biLU_rep45_MX     | biLU_rep85_RR | 215451.57 | 185800.59 | 29650.98  | 0          | KS_test_SIG | 263506.7   | 271480.3   | -7973.64  | 0          | KS_test_SIG    | 385752.6   | 402417.4   | -16664.76 | 0          | KS_test_SIG | 471855.62 | 485555.92 | -13700.3  | 0          | KS_test_SIG |
| biLU_rep85_MX     | biLU_rep85_RR | 215168.4  | 185800.59 | 29367.81  | 0          | KS_test_SIG | 273827     | 271480.3   | 2346.7    | 0.79568    | KS_test_NONSIG | 386527.7   | 402417.4   | -15889.7  | 0          | KS_test_SIG | 473993.23 | 485555.92 | -11562.68 | 0          | KS_test_SIG |
| GOV_rep45_MX      | biLU_rep85_RR | 222588.98 | 185800.59 | 36788.39  | 0          | KS_test_SIG | 264914.2   | 271480.3   | -6566.14  | 0          | KS_test_SIG    | 399866.2   | 402417.4   | -2551.14  | 0          | KS_test_SIG | 482112.61 | 485555.92 | -3443.31  | 0          | KS_test_SIG |
| GOV_rep85_MX      | biLU_rep85_RR | 223954.1  | 185800.59 | 38153.52  | 0          | KS_test_SIG | 290045.4   | 271480.3   | 18565.07  | 0.00018    | KS_test_SIG    | 408422.8   | 402417.4   | 6005.43   | 0          | KS_test_SIG | 491704.87 | 485555.92 | 6148.95   | 0          | KS_test_SIG |
| GOV_rep45_RR      | GOV_rep45_RR  | 193924.26 | 185928.23 | 7996.04   | 0          | KS_test_SIG | 293120.2   | 273163.2   | 19956.98  | 0          | KS_test_SIG    | 423620.6   | 421717.3   | 1903.24   | 0          | KS_test_SIG | 501132.69 | 494548.3  | 6584.39   | 0          | KS_test_SIG |
| BL_MX             | GOV_rep45_RR  | 322259.5  | 185928.23 | 136331.3  | 0          | KS_test_SIG | 448663.5   | 273163.2   | 175500.3  | 0          | KS_test_SIG    | 487581.4   | 421717.3   | 65864.01  | 0          | KS_test_SIG | 497250.87 | 494548.3  | 2702.57   | 0          | KS_test_SIG |
| biLU_rep45_MX     | GOV_rep45_RR  | 215451.57 | 185928.23 | 29523.34  | 0          | KS_test_SIG | 263506.7   | 273163.2   | -9656.48  | 0          | KS_test_SIG    | 385752.6   | 421717.3   | -35964.75 | 0          | KS_test_SIG | 471855.62 | 494548.3  | -22692.68 | 0          | KS_test_SIG |
| biLU_rep85_MX     | GOV_rep45_RR  | 215168.4  | 185928.23 | 29240.17  | 0          | KS_test_SIG | 273827     | 273163.2   | 663.86    | 0          | KS_test_SIG    | 386527.7   | 421717.3   | -35189.68 | 0          | KS_test_SIG | 473993.23 | 494548.3  | -20555.07 | 0          | KS_test_SIG |
| GOV_rep45_MX      | GOV_rep45_RR  | 222588.98 | 185928.23 | 36660.75  | 0          | KS_test_SIG | 264914.2   | 273163.2   | -8248.98  | 0.00503    | KS_test_SIG    | 399866.2   | 421717.3   | -21851.12 | 0          | KS_test_SIG | 482112.61 | 494548.3  | -12435.69 | 0          | KS_test_SIG |
| GOV_rep85_MX      | GOV_rep45_RR  | 223954.1  | 185928.23 | 38025.88  | 0          | KS_test_SIG | 290045.4   | 273163.2   | 16882.23  | 0          | KS_test_SIG    | 408422.8   | 421717.3   | -13294.55 | 0          | KS_test_SIG | 491704.87 | 494548.3  | -2843.43  | 0          | KS_test_SIG |
| BL_MX             | GOV_rep85_RR  | 322259.5  | 193924.26 | 128335.2  | 0          | KS_test_SIG | 448663.5   | 293120.2   | 155543.3  | 0          | KS_test_SIG    | 487581.4   | 423620.6   | 63960.76  | 0          | KS_test_SIG | 497250.87 | 501132.69 | -3881.82  | 0          | KS_test_SIG |
| biLU_rep45_MX     | GOV_rep85_RR  | 215451.57 | 193924.26 | 21527.3   | 0          | KS_test_SIG | 263506.7   | 293120.2   | -29613.46 | 0          | KS_test_SIG    | 385752.6   | 423620.6   | -37867.99 | 0          | KS_test_SIG | 471855.62 | 501132.69 | -29277.07 | 0          | KS_test_SIG |
| biLU_rep85_MX     | GOV_rep85_RR  | 215168.4  | 193924.26 | 21244.13  | 0          | KS_test_SIG | 273827     | 293120.2   | -19293.12 | 5.00E-05   | KS_test_SIG    | 386527.7   | 423620.6   | -37092.93 | 0          | KS_test_SIG | 473993.23 | 501132.69 | -27139.46 | 0          | KS_test_SIG |
| GOV_rep45_MX      | GOV_rep85_RR  | 222588.98 | 193924.26 | 28664.71  | 0          | KS_test_SIG | 264914.2   | 293120.2   | -28205.96 | 0          | KS_test_SIG    | 399866.2   | 423620.6   | -23754.37 | 0          | KS_test_SIG | 482112.61 | 501132.69 | -19020.08 | 0          | KS_test_SIG |
| GOV_rep85_MX      | GOV_rep85_RR  | 223954.1  | 193924.26 | 30029.84  | 0          | KS_test_SIG | 290045.4   | 293120.2   | -3074.76  | 0.43328    | KS_test_NONSIG | 408422.8   | 423620.6   | -15197.79 | 0          | KS_test_SIG | 491704.87 | 501132.69 | -9427.82  | 0          | KS_test_SIG |
| biLU_rep45_MX     | BL_MX         | 215451.57 | 322259.5  | -106807.9 | 0          | KS_test_SIG | 263506.7   | 448663.5   | -185156.8 | 0          | KS_test_SIG    | 385752.6   | 487581.4   | -101828.8 | 0          | KS_test_SIG | 471855.62 | 497250.87 | -25395.25 | 0          | KS_test_SIG |
| biLU_rep85_MX     | BL_MX         | 215168.4  | 322259.5  | -107091.1 | 0          | KS_test_SIG | 273827     | 448663.5   | -174836.4 | 0          | KS_test_SIG    | 386527.7   | 487581.4   | -101053.7 | 0          | KS_test_SIG | 473993.23 | 497250.87 | -23257.63 | 0          | KS_test_SIG |
| GOV_rep45_MX      | BL_MX         | 222588.98 | 322259.5  | -99670.52 | 0          | KS_test_SIG | 264914.2   | 448663.5   | -183749.3 | 0          | KS_test_SIG    | 399866.2   | 487581.4   | -87715.13 | 0          | KS_test_SIG | 482112.61 | 497250.87 | -15138.26 | 0          | KS_test_SIG |
| GOV_rep85_MX      | BL_MX         | 223954.1  | 322259.5  | -98305.4  | 0          | KS_test_SIG | 290045.4   | 448663.5   | -158618.1 | 0          | KS_test_SIG    | 408422.8   | 487581.4   | -79158.56 | 0          | KS_test_SIG | 491704.87 | 497250.87 | -5546     | 0          | KS_test_SIG |
| biLU_rep85_MX     | biLU_rep45_MX | 215168.4  | 215451.57 | -283.17   | 0.015      | KS_test_SIG | 273827     | 263506.7   | 10320.34  | 0          | KS_test_SIG    | 386527.7   | 385752.6   | 775.06    | 0          | KS_test_SIG | 473993.23 | 471855.62 | 2137.61   | #####      | KS_test_SIG |
| GOV_rep45_MX      | biLU_rep45_MX | 222588.98 | 215451.57 | 7137.41   | 0          | KS_test_SIG | 264914.2   | 263506.7   | 1407.5    | 0.00101    | KS_test_SIG    | 399866.2   | 385752.6   | 14113.62  | 0          | KS_test_SIG | 482112.61 | 471855.62 | 10256.99  | 0          | KS_test_SIG |
| GOV_rep85_MX      | biLU_rep45_MX | 223954.1  | 215451.57 | 8502.54   | 0          | KS_test_SIG | 290045.4   | 263506.7   | 26538.71  | 0          | KS_test_SIG    | 408422.8   | 385752.6   | 22670.2   | 0          | KS_test_SIG | 491704.87 | 471855.62 | 19849.25  | 0          | KS_test_SIG |
| GOV_rep45_MX      | biLU_rep85_MX | 222588.98 | 215168.4  | 7420.58   | 0          | KS_test_SIG | 264914.2   | 273827     | -8912.84  | 1.00E-05   | KS_test_SIG    | 399866.2   | 386527.7   | 13338.56  | 0          | KS_test_SIG | 482112.61 | 473993.23 | 8119.37   | 0          | KS_test_SIG |
| GOV_rep85_MX      | biLU_rep85_MX | 223954.1  | 215168.4  | 8785.71   | 0          | KS_test_SIG | 290045.4   | 273827     | 16218.37  | 0.00035    | KS_test_SIG    | 408422.8   | 386527.7   | 21895.14  | 0          | KS_test_SIG | 491704.87 | 473993.23 | 17711.64  | 0          | KS_test_SIG |
| GOV_rep85_MX      | GOV_rep45_MX  | 223954.1  | 222588.98 | 1365.13   | 0.0014     | KS_test_SIG | 290045.4   | 264914.2   | 25131.21  | 0          | KS_test_SIG    | 408422.8   | 399866.2   | 8556.57   | 0          | KS_test_SIG | 491704.87 | 482112.61 | 9592.26   | 0          | KS_test_SIG |



Supplementary Table 2. Continuation

| Scenario compared |               | SEPTEMBER  |            |           |            |                | OCTOBER    |            |           |            |                | NOVEMBER   |            |           |            |                | DECEMBER   |            |           |            |             |
|-------------------|---------------|------------|------------|-----------|------------|----------------|------------|------------|-----------|------------|----------------|------------|------------|-----------|------------|----------------|------------|------------|-----------|------------|-------------|
| Scenario 1        | Scenario 2    | mean_sim 1 | mean_sim 2 | diff      | KS_p-value | KS_sig         | mean_sim 1 | mean_sim 2 | diff      | KS_p-value | KS_sig         | mean_sim 1 | mean_sim 2 | diff      | KS_p-value | KS_sig         | mean_sim 1 | mean_sim 2 | diff      | KS_p-value | KS_sig      |
| biLU_rep45_RR     | BL_RR         | 261686.2   | 232287.7   | 29398.51  | 0          | KS_test_SIG    | 217489.7   | 207736.3   | 9753.43   | 0          | KS_test_SIG    | 193527.1   | 193637.6   | -110.5    | 0          | KS_test_SIG    | 177082.7   | 211526     | -34443.27 | 0          | KS_test_SIG |
| biLU_rep85_RR     | BL_RR         | 269082.4   | 232287.7   | 36794.67  | 0          | KS_test_SIG    | 225525.1   | 207736.3   | 17788.86  | 0          | KS_test_SIG    | 201353.4   | 193637.6   | 7715.86   | 0          | KS_test_SIG    | 183678.6   | 211526     | -27847.42 | 0          | KS_test_SIG |
| GOV_rep45_RR      | BL_RR         | 262616.8   | 232287.7   | 30329.09  | 0          | KS_test_SIG    | 219936     | 207736.3   | 12199.76  | 0          | KS_test_SIG    | 197237.5   | 193637.6   | 3599.93   | 0          | KS_test_SIG    | 180589.5   | 211526     | -30936.48 | 0          | KS_test_SIG |
| GOV_rep85_RR      | BL_RR         | 281514.9   | 232287.7   | 49227.17  | 0          | KS_test_SIG    | 236914.7   | 207736.3   | 29178.4   | 0          | KS_test_SIG    | 211851.9   | 193637.6   | 18214.35  | 0          | KS_test_SIG    | 193347.2   | 211526     | -18178.82 | 0          | KS_test_SIG |
| BL_MX             | BL_RR         | 238083.6   | 232287.7   | 5795.86   | 0.00227    | KS_test_SIG    | 222131.6   | 207736.3   | 14395.38  | 0          | KS_test_SIG    | 230109.5   | 193637.6   | 36471.91  | 0          | KS_test_SIG    | 231495.8   | 211526     | 19969.82  | 0          | KS_test_SIG |
| biLU_rep45_MX     | BL_RR         | 266882.5   | 232287.7   | 34594.77  | 0          | KS_test_SIG    | 222180.2   | 207736.3   | 14439.99  | 0          | KS_test_SIG    | 202365.1   | 193637.6   | 8727.57   | 0          | KS_test_SIG    | 206475.7   | 211526     | -5050.31  | 0          | KS_test_SIG |
| biLU_rep85_MX     | BL_RR         | 273194.4   | 232287.7   | 40906.67  | 0          | KS_test_SIG    | 231568.7   | 207736.3   | 23832.41  | 0          | KS_test_SIG    | 207973.4   | 193637.6   | 14335.83  | 0          | KS_test_SIG    | 215383.7   | 211526     | 3857.72   | 0          | KS_test_SIG |
| GOV_rep45_MX      | BL_RR         | 268424     | 232287.7   | 36136.26  | 0          | KS_test_SIG    | 224682.6   | 207736.3   | 16946.31  | 0          | KS_test_SIG    | 208614.3   | 193637.6   | 14976.76  | 0          | KS_test_SIG    | 209317.3   | 211526     | -2208.68  | 0          | KS_test_SIG |
| GOV_rep85_MX      | BL_RR         | 288341.9   | 232287.7   | 56054.19  | 0          | KS_test_SIG    | 242812.6   | 207736.3   | 35076.32  | 0          | KS_test_SIG    | 220325.5   | 193637.6   | 26687.91  | 0          | KS_test_SIG    | 225838.2   | 211526     | 14312.19  | 0          | KS_test_SIG |
| biLUrep85_RR      | biLU_rep45_RR | 269082.4   | 261686.2   | 7396.16   | 0.00874    | KS_test_SIG    | 225525.1   | 217489.7   | 8035.43   | 3.00E-05   | KS_test_SIG    | 201353.4   | 193527.1   | 7826.36   | 0          | KS_test_SIG    | 183678.6   | 177082.7   | 6595.85   | 0          | KS_test_SIG |
| GOV_rep45_RR      | biLU_rep45_RR | 262616.8   | 261686.2   | 930.58    | 0.00702    | KS_test_SIG    | 219936     | 217489.7   | 2446.33   | 0.00041    | KS_test_SIG    | 197237.5   | 193527.1   | 3710.42   | 7.00E-05   | KS_test_SIG    | 180589.5   | 177082.7   | 3506.79   | 0          | KS_test_SIG |
| GOV_rep85_RR      | biLU_rep45_RR | 281514.9   | 261686.2   | 19828.67  | 0          | KS_test_SIG    | 236914.7   | 217489.7   | 19424.97  | 0          | KS_test_SIG    | 211851.9   | 193527.1   | 18324.85  | 0          | KS_test_SIG    | 193347.2   | 177082.7   | 16264.45  | 0          | KS_test_SIG |
| BL_MX             | biLU_rep45_RR | 238083.6   | 261686.2   | -23602.65 | 0          | KS_test_SIG    | 222131.6   | 217489.7   | 4641.96   | 0          | KS_test_SIG    | 230109.5   | 193527.1   | 36582.41  | 0          | KS_test_SIG    | 231495.8   | 177082.7   | 54413.1   | 0          | KS_test_SIG |
| biLUrep45_MX      | biLU_rep45_RR | 266882.5   | 261686.2   | 5196.26   | 0.05968    | KS_test_NONSIG | 222180.2   | 217489.7   | 4690.57   | 0.02489    | KS_test_SIG    | 202365.1   | 193527.1   | 8838.07   | 0          | KS_test_SIG    | 206475.7   | 177082.7   | 29392.97  | 0          | KS_test_SIG |
| biLUrep85_MX      | biLU_rep45_RR | 273194.4   | 261686.2   | 11508.16  | 2.00E-05   | KS_test_SIG    | 231568.7   | 217489.7   | 14078.99  | 0          | KS_test_SIG    | 207973.4   | 193527.1   | 14446.33  | 0          | KS_test_SIG    | 215383.7   | 177082.7   | 38300.99  | 0          | KS_test_SIG |
| GOV_rep45_MX      | biLU_rep45_RR | 268424     | 261686.2   | 6737.75   | 0          | KS_test_SIG    | 224682.6   | 217489.7   | 7192.88   | 0          | KS_test_SIG    | 208614.3   | 193527.1   | 10807.25  | 0          | KS_test_SIG    | 209317.3   | 177082.7   | 32234.59  | 0          | KS_test_SIG |
| GOV_rep85_MX      | biLU_rep45_RR | 288341.9   | 261686.2   | 26655.68  | 0          | KS_test_SIG    | 242812.6   | 217489.7   | 25322.89  | 0          | KS_test_SIG    | 220325.5   | 193527.1   | 26798.4   | 0          | KS_test_SIG    | 225838.2   | 177082.7   | 48755.47  | 0          | KS_test_SIG |
| GOV_rep45_RR      | biLU_rep85_RR | 262616.8   | 269082.4   | -6465.57  | 0.0107     | KS_test_SIG    | 219936     | 225525.1   | -5589.1   | 0.00211    | KS_test_SIG    | 197237.5   | 201353.4   | -4115.93  | 2.00E-05   | KS_test_SIG    | 180589.5   | 183678.6   | -3089.06  | 0          | KS_test_SIG |
| GOV_rep85_RR      | biLU_rep85_RR | 281514.9   | 269082.4   | 12432.51  | 0          | KS_test_SIG    | 236914.7   | 225525.1   | 11389.54  | 0          | KS_test_SIG    | 211851.9   | 201353.4   | 10498.49  | 0          | KS_test_SIG    | 193347.2   | 183678.6   | 9668.6    | 0          | KS_test_SIG |
| BL_MX             | biLU_rep85_RR | 238083.6   | 269082.4   | -30998.81 | 0          | KS_test_SIG    | 222131.6   | 225525.1   | -3393.47  | 2.00E-05   | KS_test_SIG    | 230109.5   | 201353.4   | 28756.05  | 0          | KS_test_SIG    | 231495.8   | 183678.6   | 47817.25  | 0          | KS_test_SIG |
| biLU_rep45_MX     | biLU_rep85_RR | 266882.5   | 269082.4   | -2199.9   | 0.39698    | KS_test_NONSIG | 222180.2   | 225525.1   | -3344.86  | 0.01395    | KS_test_SIG    | 202365.1   | 201353.4   | 1011.71   | 0.19116    | KS_test_NONSIG | 206475.7   | 183678.6   | 22792.12  | 0          | KS_test_SIG |
| biLU_rep85_MX     | biLU_rep85_RR | 273194.4   | 269082.4   | 4112      | 0.39067    | KS_test_NONSIG | 231568.7   | 225525.1   | 6043.56   | 0.00063    | KS_test_SIG    | 207973.4   | 201353.4   | 6619.97   | 0          | KS_test_SIG    | 215383.7   | 183678.6   | 31705.14  | 0          | KS_test_SIG |
| GOV_rep45_MX      | biLU_rep85_RR | 268424     | 269082.4   | -658.41   | 0.085      | KS_test_NONSIG | 224682.6   | 225525.1   | -842.55   | 0.47491    | KS_test_NONSIG | 208614.3   | 201353.4   | 7260.99   | 0          | KS_test_SIG    | 209317.3   | 183678.6   | 25638.74  | 0          | KS_test_SIG |
| GOV_rep85_MX      | biLU_rep85_RR | 288341.9   | 269082.4   | 19259.52  | 0          | KS_test_SIG    | 242812.6   | 225525.1   | 17287.46  | 0          | KS_test_SIG    | 220325.5   | 201353.4   | 18972.05  | 0          | KS_test_SIG    | 225838.2   | 183678.6   | 42159.62  | 0          | KS_test_SIG |
| GOV_rep85_RR      | GOV_rep45_RR  | 281514.9   | 262616.8   | 18998.08  | 0          | KS_test_SIG    | 236914.7   | 219936     | 16978.64  | 0          | KS_test_SIG    | 211851.9   | 197237.5   | 14614.43  | 0          | KS_test_SIG    | 193347.2   | 180589.5   | 12757.66  | 0          | KS_test_SIG |
| BL_MX             | GOV_rep45_RR  | 238083.6   | 262616.8   | -24533.24 | 0          | KS_test_SIG    | 222131.6   | 219936     | 2195.62   | 0          | KS_test_SIG    | 230109.5   | 197237.5   | 32871.99  | 0          | KS_test_SIG    | 231495.8   | 180589.5   | 50906.31  | 0          | KS_test_SIG |
| biLU_rep45_MX     | GOV_rep45_RR  | 266882.5   | 262616.8   | 4265.68   | 0.41155    | KS_test_NONSIG | 222180.2   | 219936     | 2244.23   | 0.23811    | KS_test_NONSIG | 202365.1   | 197237.5   | 5127.64   | 0          | KS_test_SIG    | 206475.7   | 180589.5   | 25886.18  | 0          | KS_test_SIG |
| biLU_rep85_MX     | GOV_rep45_RR  | 273194.4   | 262616.8   | 10577.58  | 0.00031    | KS_test_SIG    | 231568.7   | 219936     | 11632.65  | 0          | KS_test_SIG    | 207973.4   | 197237.5   | 10735.99  | 0          | KS_test_SIG    | 215383.7   | 180589.5   | 34794.2   | 0          | KS_test_SIG |
| GOV_rep45_MX      | GOV_rep45_RR  | 268424     | 262616.8   | 5807.17   | 0.04025    | KS_test_SIG    | 224682.6   | 219936     | 4746.55   | 0.01213    | KS_test_SIG    | 208614.3   | 197237.5   | 11376.83  | 0          | KS_test_SIG    | 209317.3   | 180589.5   | 28727.8   | 0          | KS_test_SIG |
| GOV_rep85_MX      | GOV_rep45_RR  | 288341.9   | 262616.8   | 25725.09  | 0          | KS_test_SIG    | 242812.6   | 219936     | 22876.56  | 0          | KS_test_SIG    | 220325.5   | 197237.5   | 23087.98  | 0          | KS_test_SIG    | 225838.2   | 180589.5   | 45248.68  | 0          | KS_test_SIG |
| BL_MX             | GOV_rep85_RR  | 238083.6   | 281514.9   | -43431.32 | 0          | KS_test_SIG    | 222131.6   | 236914.7   | -14783.02 | 0          | KS_test_SIG    | 230109.5   | 211851.9   | 18257.56  | 0          | KS_test_SIG    | 231495.8   | 193347.2   | 38148.65  | 0          | KS_test_SIG |
| biLU_rep45_MX     | GOV_rep85_RR  | 266882.5   | 281514.9   | -14632.4  | 0          | KS_test_SIG    | 222180.2   | 236914.7   | -14734.41 | 0          | KS_test_SIG    | 202365.1   | 211851.9   | -9486.79  | 0          | KS_test_SIG    | 206475.7   | 193347.2   | 13128.52  | 0          | KS_test_SIG |
| biLU_rep85_MX     | GOV_rep85_RR  | 273194.4   | 281514.9   | -8320.5   | 0          | KS_test_SIG    | 231568.7   | 236914.7   | -5345.98  | 0          | KS_test_SIG    | 207973.4   | 211851.9   | -3878.52  | 0          | KS_test_SIG    | 215383.7   | 193347.2   | 22036.54  | 0          | KS_test_SIG |
| GOV_rep45_MX      | GOV_rep85_RR  | 268424     | 281514.9   | -13090.91 | 0          | KS_test_SIG    | 224682.6   | 236914.7   | -12232.09 | 0          | KS_test_SIG    | 208614.3   | 211851.9   | -3237.6   | 0          | KS_test_SIG    | 209317.3   | 193347.2   | 15970.14  | 0          | KS_test_SIG |
| GOV_rep85_MX      | GOV_rep85_RR  | 288341.9   | 281514.9   | 6827.01   | 0.04678    | KS_test_SIG    | 242812.6   | 236914.7   | 5897.92   | 0.00224    | KS_test_SIG    | 220325.5   | 211851.9   | 8473.55   | 0          | KS_test_SIG    | 225838.2   | 193347.2   | 32491.02  | 0          | KS_test_SIG |
| biLU_rep45_MX     | BL_MX         | 266882.5   | 238083.6   | 28798.91  | 0          | KS_test_SIG    | 222180.2   | 222131.6   | 48.61     | 0          | KS_test_SIG    | 202365.1   | 230109.5   | -27744.34 | 0          | KS_test_SIG    | 206475.7   | 231495.8   | -25020.13 | 0          | KS_test_SIG |
| biLU_rep85_MX     | BL_MX         | 273194.4   | 238083.6   | 35110.81  | 0          | KS_test_SIG    | 231568.7   | 222131.6   | 9437.03   | 0          | KS_test_SIG    | 207973.4   | 230109.5   | -22136.08 | 0          | KS_test_SIG    | 215383.7   | 231495.8   | -16112.1  | 0          | KS_test_SIG |
| GOV_rep45_MX      | BL_MX         | 268424     | 238083.6   | 30340.4   | 0          | KS_test_SIG    | 224682.6   | 222131.6   | 2550.93   | 1.00E-05   | KS_test_SIG    | 208614.3   | 230109.5   | -21495.16 | 0          | KS_test_SIG    | 209317.3   | 231495.8   | -22178.51 | 0          | KS_test_SIG |
| GOV_rep85_MX      | BL_MX         | 288341.9   | 238083.6   | 50258.33  | 0          | KS_test_SIG    | 242812.6   | 222131.6   | 20680.94  | 0          | KS_test_SIG    | 220325.5   | 230109.5   | -9784     | 0          | KS_test_SIG    | 225838.2   | 231495.8   | -5657.63  | 0          | KS_test_SIG |
| biLU_rep85_MX     | biLU_rep45_MX | 273194.4   | 266882.5   | 6311.9    | 0.03505    | KS_test_SIG    | 231568.7   | 222180.2   | 9388.42   | 0          | KS_test_SIG    | 207973.4   | 202365.1   | 5608.26   | 6.00E-05   | KS_test_SIG    | 215383.7   | 206475.7   | 8908.03   | 0          | KS_test_SIG |
| GOV_rep45_MX      | biLU_rep45_MX | 268424     | 266882.5   | 1541.49   | 0.00297    | KS_test_SIG    | 224682.6   | 222180.2   | 2502.32   | 0.00104    | KS_test_SIG    | 208614.3   | 202365.1   | 6249.19   | 0          | KS_test_SIG    | 209317.3   | 206475.7   | 2841.62   | 0          | KS_test_SIG |
| GOV_rep85_MX      | biLU_rep45_MX | 288341.9   | 266882.5   | 21459.42  | 0          | KS_test_SIG    | 242812.6   | 222180.2   | 20632.33  | 0          | KS_test_SIG    | 220325.5   | 202365.1   | 17960.34  | 0          | KS_test_SIG    | 225838.2   | 206475.7   | 19362.5   | 0          | KS_test_SIG |
| GOV_rep45_MX      | biLU_rep85_MX | 268424     | 273194.4   | -4770.41  | 0.01688    | KS_test_SIG    | 224682.6   | 231568.7   | -6886.1   | 6.00E-04   | KS_test_SIG    | 208614.3   | 207973.4   | 640.93    | 0.28987    | KS_test_NONSIG | 209317.3   | 215383.7   | -6066.4   | 0          | KS_test_SIG |
| GOV_rep85_MX      | biLU_rep85_MX | 288341.9   | 273194.4   | 15147.52  | 0          | KS_test_SIG    | 242812.6   | 231568.7   | 11243.9   | 0          | KS_test_SIG    | 220325.5   | 207973.4   | 12352.08  | 0          | KS_test_SIG    | 225838.2   | 215383.7   | 10454.47  | 0          | KS_test_SIG |
| GOV_rep85_MX      | GOV_rep45_MX  | 288341.9   | 268424     | 19917.93  | 0          | KS_test_SIG    | 242812.6   | 224682.6   | 18130.01  | 0          | KS_test_SIG    | 220325.5   | 208614.3   | 11711.15  | 0          | KS_test_SIG    | 225838.2   | 209317.3   | 16520.88  | 0          | KS_test_SIG |

Supplementary Table 3. Results of pair-wise t-test for minimum production month among scenarios.

| sim_1         | mean_sim1 | sim_2         | mean_sim2  | diff      | T_p-value | T_sig         |
|---------------|-----------|---------------|------------|-----------|-----------|---------------|
| bILU_rcp45_RR | 5329518.5 | BL_RR         | 5800365.52 | -470847.1 | 0.00201   | T_test_SIG    |
| bILU_rcp85_RR | 5439201.9 | BL_RR         | 5800365.52 | -361163.7 | 0.02303   | T_test_SIG    |
| GOV_rcp45_RR  | 5422276   | BL_RR         | 5800365.52 | -378089.5 | 0.07009   | T_test_NONSIG |
| GOV_rcp85_RR  | 5695975.2 | BL_RR         | 5800365.52 | -104390.3 | 0.60659   | T_test_NONSIG |
| BL_MX         | 6676409.1 | BL_RR         | 5800365.52 | 876043.57 | 1.00E-05  | T_test_SIG    |
| bILUrcp45_MX  | 5925303.1 | BL_RR         | 5800365.52 | 124937.57 | 0.40855   | T_test_NONSIG |
| bILUrcp85_MX  | 5975860.8 | BL_RR         | 5800365.52 | 175495.24 | 0.35149   | T_test_NONSIG |
| GOV_rcp45_MX  | 6133839.6 | BL_RR         | 5800365.52 | 333474.1  | 0.11169   | T_test_NONSIG |
| GOV_rcp85_MX  | 6253098.7 | BL_RR         | 5800365.52 | 452733.19 | 0.05783   | T_test_NONSIG |
| bILU_rcp85_RR | 5439201.9 | bILU_rcp45_RR | 5329518.48 | 109683.38 | 0.42995   | T_test_NONSIG |
| GOV_rcp45_RR  | 5422276   | bILU_rcp45_RR | 5329518.48 | 92757.52  | 0.63074   | T_test_NONSIG |
| GOV_rcp85_RR  | 5695975.2 | bILU_rcp45_RR | 5329518.48 | 366456.76 | 0.06254   | T_test_NONSIG |
| BL_MX         | 6676409.1 | bILU_rcp45_RR | 5329518.48 | 1346890.6 | 0         | T_test_SIG    |
| bILUrcp45_MX  | 5925303.1 | bILU_rcp45_RR | 5329518.48 | 595784.62 | 7.00E-05  | T_test_SIG    |
| bILUrcp85_MX  | 5975860.8 | bILU_rcp45_RR | 5329518.48 | 646342.29 | 0.00075   | T_test_SIG    |
| GOV_rcp45_MX  | 6133839.6 | bILU_rcp45_RR | 5329518.48 | 804321.14 | 0.00024   | T_test_SIG    |
| GOV_rcp85_MX  | 6253098.7 | bILU_rcp45_RR | 5329518.48 | 923580.24 | 0.00025   | T_test_SIG    |
| GOV_rcp45_RR  | 5422276   | bILU_rcp85_RR | 5439201.86 | -16925.86 | 0.93278   | T_test_NONSIG |
| GOV_rcp85_RR  | 5695975.2 | bILU_rcp85_RR | 5439201.86 | 256773.38 | 0.20299   | T_test_NONSIG |
| BL_MX         | 6676409.1 | bILU_rcp85_RR | 5439201.86 | 1237207.2 | 0         | T_test_SIG    |
| bILUrcp45_MX  | 5925303.1 | bILU_rcp85_RR | 5439201.86 | 486101.24 | 0.0018    | T_test_SIG    |
| bILUrcp85_MX  | 5975860.8 | bILU_rcp85_RR | 5439201.86 | 536658.9  | 0.00573   | T_test_SIG    |
| GOV_rcp45_MX  | 6133839.6 | bILU_rcp85_RR | 5439201.86 | 694637.76 | 0.00153   | T_test_SIG    |
| GOV_rcp85_MX  | 6253098.7 | bILU_rcp85_RR | 5439201.86 | 813896.86 | 0.00118   | T_test_SIG    |
| GOV_rcp85_RR  | 5695975.2 | GOV_rcp45_RR  | 5422276    | 273699.24 | 0.25714   | T_test_NONSIG |
| BL_MX         | 6676409.1 | GOV_rcp45_RR  | 5422276    | 1254133.1 | 0         | T_test_SIG    |
| bILUrcp45_MX  | 5925303.1 | GOV_rcp45_RR  | 5422276    | 503027.1  | 0.01542   | T_test_SIG    |
| bILUrcp85_MX  | 5975860.8 | GOV_rcp45_RR  | 5422276    | 553584.76 | 0.01868   | T_test_SIG    |
| GOV_rcp45_MX  | 6133839.6 | GOV_rcp45_RR  | 5422276    | 711563.62 | 0.00524   | T_test_SIG    |
| GOV_rcp85_MX  | 6253098.7 | GOV_rcp45_RR  | 5422276    | 830822.71 | 0.00306   | T_test_SIG    |
| BL_MX         | 6676409.1 | GOV_rcp85_RR  | 5695975.24 | 980433.86 | 4.00E-05  | T_test_SIG    |
| bILUrcp45_MX  | 5925303.1 | GOV_rcp85_RR  | 5695975.24 | 229327.86 | 0.24878   | T_test_NONSIG |
| bILUrcp85_MX  | 5975860.8 | GOV_rcp85_RR  | 5695975.24 | 279885.52 | 0.21967   | T_test_NONSIG |
| GOV_rcp45_MX  | 6133839.6 | GOV_rcp85_RR  | 5695975.24 | 437864.38 | 0.07529   | T_test_NONSIG |
| GOV_rcp85_MX  | 6253098.7 | GOV_rcp85_RR  | 5695975.24 | 557123.48 | 0.03984   | T_test_SIG    |
| bILUrcp45_MX  | 5925303.1 | BL_MX         | 6676409.1  | -751106   | 3.00E-05  | T_test_SIG    |
| bILUrcp85_MX  | 5975860.8 | BL_MX         | 6676409.1  | -700548.3 | 0.00089   | T_test_SIG    |
| GOV_rcp45_MX  | 6133839.6 | BL_MX         | 6676409.1  | -542569.5 | 0.0148    | T_test_SIG    |
| GOV_rcp85_MX  | 6253098.7 | BL_MX         | 6676409.1  | -423310.4 | 0.08295   | T_test_NONSIG |
| bILUrcp85_MX  | 5975860.8 | bILU_rcp45_MX | 5925303.1  | 50557.67  | 0.78039   | T_test_NONSIG |
| GOV_rcp45_MX  | 6133839.6 | bILU_rcp45_MX | 5925303.1  | 208536.52 | 0.30189   | T_test_NONSIG |
| GOV_rcp85_MX  | 6253098.7 | bILU_rcp45_MX | 5925303.1  | 327795.62 | 0.15575   | T_test_NONSIG |
| GOV_rcp45_MX  | 6133839.6 | bILU_rcp85_MX | 5975860.76 | 157978.86 | 0.49137   | T_test_NONSIG |
| GOV_rcp85_MX  | 6253098.7 | bILU_rcp85_MX | 5975860.76 | 277237.95 | 0.2759    | T_test_NONSIG |
| GOV_rcp85_MX  | 6253098.7 | GOV_rcp45_MX  | 6133839.62 | 119259.1  | 0.65458   | T_test_NONSIG |

## Supplementary References

1. Soares-Filho, B. S. *et al.* Modelling conservation in the Amazon basin. *Nature* **440**, 520–523 (2006).
