# Supplementary material for: Impacts of climate change and deforestation on hydropower planning in the Brazilian Amazon
Source: Springer Nature journal article supplement (doi:10.1038/s41893-020-0492-y), 2020-03-16
Supplement: 41893_2020_492_MOESM2_ESM.pdf [file 41893_2020_492_MOESM2_ESM.pdf]

## Reporting Summary

Nature Research wishes to improve the reproducibility of the work that we publish. This form provides structure for consistency and transparency in reporting. For further information on Nature Research policies, see [Authors & Referees](#) and the [Editorial Policy Checklist](#).

### Statistics

For all statistical analyses, confirm that the following items are present in the figure legend, table legend, main text, or Methods section.

n/a Confirmed

- |                                     |                                     |                                                                                                                                                                                                                                                            |
|-------------------------------------|-------------------------------------|------------------------------------------------------------------------------------------------------------------------------------------------------------------------------------------------------------------------------------------------------------|
| <input type="checkbox"/>            | <input checked="" type="checkbox"/> | The exact sample size ( $n$ ) for each experimental group/condition, given as a discrete number and unit of measurement                                                                                                                                    |
| <input type="checkbox"/>            | <input checked="" type="checkbox"/> | A statement on whether measurements were taken from distinct samples or whether the same sample was measured repeatedly                                                                                                                                    |
| <input type="checkbox"/>            | <input checked="" type="checkbox"/> | The statistical test(s) used AND whether they are one- or two-sided<br><i>Only common tests should be described solely by name; describe more complex techniques in the Methods section.</i>                                                               |
| <input checked="" type="checkbox"/> | <input type="checkbox"/>            | A description of all covariates tested                                                                                                                                                                                                                     |
| <input type="checkbox"/>            | <input checked="" type="checkbox"/> | A description of any assumptions or corrections, such as tests of normality and adjustment for multiple comparisons                                                                                                                                        |
| <input type="checkbox"/>            | <input checked="" type="checkbox"/> | A full description of the statistical parameters including central tendency (e.g. means) or other basic estimates (e.g. regression coefficient) AND variation (e.g. standard deviation) or associated estimates of uncertainty (e.g. confidence intervals) |
| <input checked="" type="checkbox"/> | <input type="checkbox"/>            | For null hypothesis testing, the test statistic (e.g. $F$ , $t$ , $r$ ) with confidence intervals, effect sizes, degrees of freedom and $P$ value noted<br><i>Give <math>P</math> values as exact values whenever suitable.</i>                            |
| <input checked="" type="checkbox"/> | <input type="checkbox"/>            | For Bayesian analysis, information on the choice of priors and Markov chain Monte Carlo settings                                                                                                                                                           |
| <input checked="" type="checkbox"/> | <input type="checkbox"/>            | For hierarchical and complex designs, identification of the appropriate level for tests and full reporting of outcomes                                                                                                                                     |
| <input checked="" type="checkbox"/> | <input type="checkbox"/>            | Estimates of effect sizes (e.g. Cohen's $d$ , Pearson's $r$ ), indicating how they were calculated                                                                                                                                                         |

*Our web collection on [statistics for biologists](#) contains articles on many of the points above.*

### Software and code

Policy information about [availability of computer code](#)

Data collection

We used the Ecosystem Demography Model Version 2 (ED2) in order to simulate the effect of global climate change and regional deforestation on the water cycle. ED2 is an individual-based terrestrial biosphere model that describes vegetation dynamics (growth, reproduction, and mortality), and accompanying energy, carbon and water fluxes of heterogeneous and functionally diverse plant canopies as a function of climate, soils, and annually-changing human disturbance characteristics.

Data analysis

we created a model network of 37 dams and reservoirs using HEC-ResSim, a well-established and simulation model developed by the US Army Corps of Engineers for feasibility and planning purposes.

For manuscripts utilizing custom algorithms or software that are central to the research but not yet described in published literature, software must be made available to editors/reviewers. We strongly encourage code deposition in a community repository (e.g. GitHub). See the Nature Research [guidelines for submitting code & software](#) for further information.

### Data

Policy information about [availability of data](#)

All manuscripts must include a [data availability statement](#). This statement should provide the following information, where applicable:

- Accession codes, unique identifiers, or web links for publicly available datasets
- A list of figures that have associated raw data
- A description of any restrictions on data availability

The HEC-ResSim model with all input and out data will be available from the corresponding author upon reasonable request

## Field-specific reporting

Please select the one below that is the best fit for your research. If you are not sure, read the appropriate sections before making your selection.

Life sciences     Behavioural & social sciences     Ecological, evolutionary & environmental sciences

For a reference copy of the document with all sections, see [nature.com/documents/nr-reporting-summary-flat.pdf](https://www.nature.com/documents/nr-reporting-summary-flat.pdf)

## Ecological, evolutionary & environmental sciences study design

All studies must disclose on these points even when the disclosure is negative.

|                                   |                                                                                                                                                                                                                                                                                                                                                                                                                                                                                                                                      |
|-----------------------------------|--------------------------------------------------------------------------------------------------------------------------------------------------------------------------------------------------------------------------------------------------------------------------------------------------------------------------------------------------------------------------------------------------------------------------------------------------------------------------------------------------------------------------------------|
| Study description                 | This interdisciplinary study synthesizes information from global/regional projections, hydropower development plans, and a series of computer models considering biosphere dynamics, surface hydrology, and reservoir routing. The study aimed at understanding the effects of Amazon's future climate and deforestation on hydropower generation in Brazil.                                                                                                                                                                         |
| Research sample                   | We studied 37 large proposed hydropower dams in the Tapajos river basin in the Brazilian Amazon. These dams account for nearly 50% of the inventoried potential expansion in Brazil.                                                                                                                                                                                                                                                                                                                                                 |
| Sampling strategy                 | The Tapajos region was selected because it represents the critical sustainability challenges that Brazil and other Amazon countries are facing. This region is an important Amazonian tributary, with large natural parks and indigenous reserves, but it is also the center of agricultural (soy) production and hydropower development. We selected these 37 dams specifically based on the Brazilian classification of large national dams, which are those with a installed capacity of 30 MW or greater.                        |
| Data collection                   | A database compiled for this study from the national hydropower inventory at ANEEL's library in Brasilia in November 2014 and updated it in February of 2016 based on recent project status updates and information collected in the field. All other data were compiled from online databases.                                                                                                                                                                                                                                      |
| Timing and spatial scale          | Baseline (historical) simulations were carried out for 1986-2005. Future projections were made for 2026-2045. All simulations were carried out at daily time steps.                                                                                                                                                                                                                                                                                                                                                                  |
| Data exclusions                   | No data were excluded from the analysis.                                                                                                                                                                                                                                                                                                                                                                                                                                                                                             |
| Reproducibility                   | Reproducibility in this study was ensured by using datasets and models that are well recognized in the scientific literature and that are available for future use. For instance, all input meteorological data came from the UK's Met Office Hadley Centre and are widely available in their website. Moreover, the hydropower reservoir simulation tool used can be downloaded and used for free by anyone. Apart from that, the experiments carried out were based on computer simulations and can be repeated at any given time. |
| Randomization                     | This aspect is not particular to our study as we based most of our analyses in computer simulations. In order to account for variability and uncertainty, however, we did carry out 20-yr long simulations at daily temporal resolution.                                                                                                                                                                                                                                                                                             |
| Blinding                          | Blinding was not particularly relevant to our study for the same reasons as stated above.                                                                                                                                                                                                                                                                                                                                                                                                                                            |
| Did the study involve field work? | <input type="checkbox"/> Yes <input checked="" type="checkbox"/> No                                                                                                                                                                                                                                                                                                                                                                                                                                                                  |

## Reporting for specific materials, systems and methods

We require information from authors about some types of materials, experimental systems and methods used in many studies. Here, indicate whether each material, system or method listed is relevant to your study. If you are not sure if a list item applies to your research, read the appropriate section before selecting a response.

### Materials & experimental systems

- |                                     |                                                      |
|-------------------------------------|------------------------------------------------------|
| n/a                                 | Involved in the study                                |
| <input checked="" type="checkbox"/> | <input type="checkbox"/> Antibodies                  |
| <input checked="" type="checkbox"/> | <input type="checkbox"/> Eukaryotic cell lines       |
| <input checked="" type="checkbox"/> | <input type="checkbox"/> Palaeontology               |
| <input checked="" type="checkbox"/> | <input type="checkbox"/> Animals and other organisms |
| <input checked="" type="checkbox"/> | <input type="checkbox"/> Human research participants |
| <input checked="" type="checkbox"/> | <input type="checkbox"/> Clinical data               |

### Methods

- |                                     |                                                 |
|-------------------------------------|-------------------------------------------------|
| n/a                                 | Involved in the study                           |
| <input checked="" type="checkbox"/> | <input type="checkbox"/> ChIP-seq               |
| <input checked="" type="checkbox"/> | <input type="checkbox"/> Flow cytometry         |
| <input checked="" type="checkbox"/> | <input type="checkbox"/> MRI-based neuroimaging |
